# Supplementary material
Source: publisher figshare collection journal article supplement (https://gsajournals.figshare.com/ndownloader/files/12349484)
Supplement: Supplementary file 1 [file 12349484]

## Sheet: Sheet1
SIP Line	Sex	Number of flies	Day bout number σ	Day sleep σ (min.)	Night bout number σ	Night sleep σ (min.)	24-hour sleep σ (min.)	Waking activity σ (cts./min.)	Sleep latency σ (min.)	Day avg. bout length σ (min.)	Night avg. bout length σ (min.)
SIP_L1_1	Combined	62	4.6587	61.6441	4.17694	21.9232	70.0113	0.241109	6.49182	15.9134	181.75
SIP_L1_2	Combined	64	4.5101	59.1674	2.75529	13.7656	64.2636	0.201565	5.07763	17.9342	150.503
SIP_L1_3	Combined	62	4.9404	58.9069	3.46198	20.8894	68.5648	0.211857	6.51136	12.2908	165.435
SIP_L1_4	Combined	64	4.55824	61.6618	3.82088	24.6668	74.9537	0.219377	6.58983	12.7091	147.011
SIP_L1_5	Combined	62	4.335	57.4041	3.96681	20.9449	66.7053	0.25978	5.66784	14.3613	175.87
SIP_L1_6	Combined	59	4.87963	56.5557	2.7699	18.9231	65.5846	0.322779	5.55645	23.4092	176.859
SIP_L1_7	Combined	62	5.02439	62.2782	4.10351	28.2068	73.9379	0.211628	6.68819	10.9133	138.987
SIP_L1_8	Combined	58	5.55675	58.2149	4.82266	30.3378	79.1601	0.26897	4.95401	14.0694	129.775
SIP_L1_9	Combined	63	4.52996	60.6507	2.92091	13.5995	66.4607	0.257401	4.95547	14.5516	176.904
SIP_L1_10	Combined	64	4.97529	76.1517	4.0344	25.509	87.5773	0.26721	6.45037	23.382	131.901
SIP_L2_1	Combined	63	4.72391	61.2391	3.90584	34.062	70.712	0.16443	9.01613	3.53157	39.4521
SIP_L2_2	Combined	61	4.76426	60.9112	3.53169	26.3776	67.6944	0.207717	7.69363	16.634	79.0542
SIP_L2_3	Combined	64	5.22909	53.7168	2.71015	23.3866	64.7637	0.273496	7.31821	14.0289	109.256
SIP_L2_4	Combined	63	5.1506	50.4734	3.40496	22.0569	61.6177	0.290737	5.59822	14.3337	96.4163
SIP_L2_5	Combined	61	5.23687	65.5989	4.09591	40.4834	85.4314	0.175353	13.1022	7.20337	77.9036
SIP_L2_6	Combined	64	4.86332	62.0083	3.2007	20.7443	68.2588	0.231789	7.60629	14.52	121.174
SIP_L2_7	Combined	64	5.24246	66.6107	2.63495	21.7758	75.4526	0.179725	8.33552	11.6267	120.416
SIP_L2_8	Combined	64	4.46444	55.2505	3.04553	21.4831	62.6812	0.193216	8.58058	8.73228	134.139
SIP_L2_10	Combined	64	5.19717	53.0477	2.53306	20.6017	62.7695	0.265186	6.31911	11.0825	124.713
SIP_S1_1	Combined	64	4.06964	47.6175	5.3429	79.1211	109.752	0.285183	86.4064	4.26335	8.20171
SIP_S1_2	Combined	61	4.60213	48.4238	4.31669	71.7364	88.1583	0.27052	110.701	2.81006	9.09562
SIP_S1_3	Combined	63	4.63784	70.1706	4.48515	80.1432	121.201	0.286086	111.185	12.8377	18.5705
SIP_S1_4	Combined	56	4.77625	62.8743	4.66426	101.296	134.607	0.159329	81.9655	15.0506	33.1586
SIP_S1_5	Combined	61	4.96951	73.6829	4.47047	85.2055	117.993	0.134604	71.1181	8.58264	19.4294
SIP_S1_6	Combined	63	4.88307	61.376	4.93217	85.2665	122.539	0.216306	73.7792	2.914	11.9611
SIP_S1_7	Combined	58	4.45174	60.1635	5.09908	75.9449	113.452	0.230127	114.326	2.94857	7.09137
SIP_S1_8	Combined	61	4.61332	69.383	4.38517	72.5622	108.852	0.172097	70.6803	8.14417	36.8047
SIP_S1_9	Combined	60	4.74149	54.5316	4.71874	66.1078	95.3629	0.191348	69.6523	3.35587	6.08414
SIP_S1_10	Combined	60	4.3809	54.1754	4.59156	74.0995	103.092	0.227653	92.6374	4.78635	13.6573
SIP_S2_1	Combined	59	3.87223	47.1419	5.32439	59.9294	89.5058	0.35826	163.307	2.77518	3.13136
SIP_S2_2	Combined	61	4.73643	55.8136	4.75122	53.3699	92.4534	0.353429	176.517	3.09125	2.61311
SIP_S2_3	Combined	60	3.98547	59.4799	5.23988	63.9112	100.823	0.286453	138.434	3.84906	4.22248
SIP_S2_4	Combined	60	4.52535	53.5434	4.83992	72.6424	107.789	0.28246	137.743	4.19611	11.1073
SIP_S2_5	Combined	57	4.36853	59.7154	4.42104	66.3397	109.863	0.296945	157.868	3.74123	12.8032
SIP_S2_6	Combined	56	4.61637	63.8128	5.61584	67.4695	107.375	0.357296	160.287	3.47333	3.8935
SIP_S2_7	Combined	63	4.2368	54.6265	3.64775	45.0125	84.1353	0.256518	128.54	9.07054	12.0375
SIP_S2_8	Combined	62	4.2773	45.8104	5.30391	62.7193	89.2829	0.331126	165.673	2.68576	4.67984
SIP_S2_9	Combined	62	3.24906	45.1771	4.63611	49.2481	79.931	0.343941	127.14	3.73329	2.71343
SIP_S2_10	Combined	63	4.64329	69.4054	5.72691	68.9611	117.035	0.3679	126.891	4.7194	9.43596
SIP_L1_1	Female	31	5.49267	77.8061	4.80634	24.9028	88.2791	0.161189	6.03632	6.08573	169.65
SIP_L1_2	Female	32	5.45672	73.2201	4.27945	22.2702	83.8644	0.161711	6.7576	7.56514	138.891
SIP_L1_3	Female	31	5.28018	66.1818	4.16939	28.295	79.8077	0.209052	6.76239	6.40348	150.572
SIP_L1_4	Female	32	4.70262	77.1598	5.28776	36.473	100.164	0.191647	7.22238	5.19495	112.354
SIP_L1_5	Female	31	4.49022	66.8879	5.10782	29.0996	81.634	0.22652	6.24666	7.39708	171.738
SIP_L1_6	Female	30	5.3135	66.4582	3.5416	25.6216	79.9558	0.229092	6.17738	7.09563	172.462
SIP_L1_7	Female	30	5.85993	80.7122	5.62668	38.3649	97.6582	0.217231	7.26262	4.44997	119.324
SIP_L1_8	Female	31	6.44248	66.9144	6.04414	35.4891	92.0096	0.25391	4.19802	6.4804	117.323
SIP_L1_9	Female	32	4.55151	70.2161	3.67559	16.0122	76.906	0.19973	5.61975	5.99402	177.757
SIP_L1_10	Female	32	5.62047	90.7795	4.17976	29.9489	102.317	0.20556	8.78155	17.4719	102.591
SIP_L2_1	Female	32	4.86887	64.5824	4.25315	40.8823	73.6608	0.143698	10.7193	2.05218	62.0107
SIP_L2_2	Female	31	5.63198	75.2379	4.05224	31.934	77.6397	0.174527	10.4507	2.7503	94.1732
SIP_L2_3	Female	32	6.10983	65.7804	3.41834	33.5873	80.4264	0.252449	11.3711	4.53968	102.269
SIP_L2_4	Female	31	6.13478	57.7306	2.84888	13.7532	63.7421	0.356269	4.30086	19.2738	155.221
SIP_L2_5	Female	31	6.10927	75.0502	5.53588	55.3268	103.021	0.164193	18.9542	3.52457	98.4751
SIP_L2_6	Female	32	5.21442	75.531	3.24786	14.5984	78.476	0.243642	5.30542	16.2843	174.125
SIP_L2_7	Female	32	5.94551	77.059	2.83035	19.843	82.75	0.179063	7.69757	11.4304	175.372
SIP_L2_8	Female	32	4.43424	59.3171	3.35671	21.0013	61.4053	0.17019	7.69547	3.5027	145.627
SIP_L2_10	Female	32	6.08943	65.0991	2.31048	15.4575	66.7722	0.28676	4.35192	11.9622	155.462
SIP_S1_1	Female	32	3.91325	35.3744	6.23066	92.4061	109.937	0.279245	94.037	1.69037	6.94413
SIP_S1_2	Female	30	5.35725	48.5364	5.18808	79.4977	91.775	0.29798	105.087	1.64491	9.08227
SIP_S1_3	Female	31	4.62074	74.225	5.12439	99.8912	145.094	0.281316	90.0386	16.6416	20.6259
SIP_S1_4	Female	27	5.14095	77.9164	5.96333	121.808	166.739	0.169448	49.6731	18.9345	51.1278
SIP_S1_5	Female	31	5.2703	83.0985	5.24437	97.9978	135.143	0.130738	60.5632	4.94579	23.7292
SIP_S1_6	Female	32	5.57134	59.6023	5.79309	97.1717	129.293	0.186546	63.5021	2.45215	6.90525
SIP_S1_7	Female	26	4.39202	46.5289	5.8647	90.1611	112.609	0.244568	99.0174	2.12386	5.27794
SIP_S1_8	Female	30	5.14646	81.8868	5.67267	78.6137	128.219	0.180827	58.3029	5.10955	59.6612
SIP_S1_9	Female	29	5.99455	60.5276	5.62083	82.6244	109.921	0.202569	78.3742	2.47013	5.5529
SIP_S1_10	Female	28	5.22651	49.8449	5.28749	84.2644	105.257	0.228354	92.6993	1.64331	6.11659
SIP_S2_1	Female	27	3.01662	29.9196	5.27225	58.2489	77.9665	0.35407	147.423	1.56378	2.77224
SIP_S2_2	Female	29	5.10635	44.3897	4.18595	45.1598	79.1555	0.355816	172.879	1.7367	2.08632
SIP_S2_3	Female	29	4.61273	54.8294	6.15583	63.8636	97.3302	0.269981	129.75	2.98725	3.3289
SIP_S2_4	Female	31	4.58154	47.8245	4.67508	53.9853	84.2044	0.274667	177.067	2.38386	4.65733
SIP_S2_5	Female	26	5.43485	51.6256	5.68114	86.4045	117.993	0.355642	172.427	2.18601	19.566
SIP_S2_6	Female	26	4.76012	49.5201	5.87706	72.5438	106.532	0.32879	162.206	1.86277	3.63126
SIP_S2_7	Female	32	3.76925	33.6417	3.30944	33.4033	57.1056	0.216039	116.585	1.52914	3.16108
SIP_S2_8	Female	30	4.29806	40.3027	6.1753	63.9234	95.0614	0.329621	167.666	1.69638	2.44852
SIP_S2_9	Female	31	2.96762	27.1874	4.9659	42.2588	62.2782	0.399654	124.115	2.51031	1.8841
SIP_S2_10	Female	31	4.66733	47.6792	6.91072	74.7533	102.381	0.234174	133.32	1.67161	3.16201
SIP_L1_1	Male	31	3.82472	45.4822	3.54755	18.9436	51.7434	0.32103	6.94732	25.741	193.851
SIP_L1_2	Male	32	3.56347	45.1148	1.23114	5.26103	44.6628	0.241419	3.39766	28.3032	162.116
SIP_L1_3	Male	31	4.60062	51.6319	2.75458	13.4837	57.3219	0.214663	6.26032	18.1781	180.298
SIP_L1_4	Male	32	4.41387	46.1638	2.354	12.8607	49.7431	0.247108	5.95728	20.2233	181.667
SIP_L1_5	Male	31	4.17978	47.9203	2.82579	12.7901	51.7765	0.293041	5.08902	21.3255	180.001
SIP_L1_6	Male	29	4.4308	46.3118	1.97159	11.9935	50.7177	0.419697	4.91412	40.2853	181.407
SIP_L1_7	Male	32	4.24106	44.9962	2.67554	18.6836	51.7002	0.206376	6.14967	16.9727	157.421
SIP_L1_8	Male	27	4.5398	48.2266	3.42021	24.4233	64.4068	0.286261	5.82198	22.7826	144.072
SIP_L1_9	Male	31	4.50771	50.7767	2.14188	11.1089	55.6785	0.316933	4.26977	23.3851	176.024
SIP_L1_10	Male	32	4.33012	61.5239	3.88904	21.0691	72.8374	0.328859	4.1192	29.2921	161.211
SIP_L2_1	Male	31	4.57427	57.788	3.54732	27.0217	67.668	0.185831	7.25797	5.05868	16.1658
SIP_L2_2	Male	30	3.86762	46.1069	2.99379	20.636	57.4176	0.242013	4.84469	30.9804	63.4313
SIP_L2_3	Male	32	4.34836	41.6532	2.00195	13.1858	49.101	0.294543	3.26534	23.5181	116.243
SIP_L2_4	Male	32	4.19717	43.443	3.94367	30.1012	59.5597	0.227253	6.85503	9.54791	39.4494
SIP_L2_5	Male	30	4.33538	55.8325	2.60795	25.1453	67.2556	0.186886	7.05521	11.0048	56.6464
SIP_L2_6	Male	32	4.51222	48.4856	3.15354	26.8902	58.0416	0.219936	9.90717	12.7557	68.2237
SIP_L2_7	Male	32	4.53941	56.1624	2.43955	23.7087	68.1553	0.180386	8.97346	11.823	65.4598
SIP_L2_8	Male	32	4.49465	51.1839	2.73435	21.9649	63.9571	0.216243	9.4657	13.9619	122.651
SIP_L2_10	Male	32	4.30491	40.9963	2.75564	25.7459	58.7668	0.243612	8.2863	10.2027	93.9628
SIP_S1_1	Male	32	4.22603	59.8606	4.45513	65.8362	109.567	0.29112	78.7757	6.83634	9.45929
SIP_S1_2	Male	31	3.87136	48.3148	3.4734	64.2254	84.6584	0.243946	116.135	3.90004	9.10896
SIP_S1_3	Male	32	4.65441	66.2429	3.86588	61.0123	98.0548	0.290707	131.671	9.15267	16.6435
SIP_S1_4	Male	29	4.43671	48.8695	3.45478	82.1995	104.691	0.149909	112.031	11.4345	15.1893
SIP_S1_5	Male	30	4.6587	63.9534	3.67078	71.9868	100.272	0.1386	82.0249	12.3407	14.8331
SIP_S1_6	Male	31	4.17258	63.2071	4.04348	72.9774	115.568	0.247027	84.3879	3.39075	17.354
SIP_S1_7	Male	32	4.50025	71.2417	4.47701	64.3943	114.137	0.218395	126.765	3.64026	8.7172
SIP_S1_8	Male	31	4.09739	57.2826	3.13921	66.706	90.1099	0.163648	82.6584	11.0809	14.6855
SIP_S1_9	Male	31	3.56927	48.9225	3.87484	50.6567	81.7438	0.180851	61.4932	4.18446	6.61538
SIP_S1_10	Male	32	3.641	57.9647	3.98262	65.2051	101.198	0.22704	92.5832	7.5365	20.938
SIP_S2_1	Male	32	4.59416	61.6733	5.36839	61.3473	99.2421	0.361796	177.073	3.68373	3.46285
SIP_S2_2	Male	32	4.4012	66.1665	5.2635	60.8103	104.505	0.351265	179.912	4.31881	3.22769
SIP_S2_3	Male	31	3.39868	63.8303	4.38303	63.9558	104.091	0.301862	147.761	4.65526	5.21916
SIP_S2_4	Male	29	4.46527	59.6567	5.01612	92.5862	133	0.290791	101.132	6.13335	17.1124
SIP_S2_5	Male	31	3.4742	66.5003	3.36418	49.5112	103.044	0.247715	145.657	5.04561	5.75866
SIP_S2_6	Male	30	4.49179	76.1998	5.38946	63.0718	108.105	0.382002	158.51	4.76178	4.15574
SIP_S2_7	Male	31	4.71943	76.2883	3.99697	56.9962	112.037	0.298304	140.083	15.8821	20.914
SIP_S2_8	Male	32	4.25783	50.9738	4.48698	61.5904	83.8655	0.332537	163.88	3.42779	6.73952
SIP_S2_9	Male	31	3.53049	63.1668	4.30632	56.2374	97.5838	0.288229	130.267	4.71957	3.57135
SIP_S2_10	Male	32	4.62001	90.4526	4.58009	63.3499	131.231	0.497448	120.461	7.67194	15.919
